# 1 Phenotypic variations of primary metabolites yield during alcoholic 2 fermentation in the *Saccharomyces cerevisiae* species

3  
4 Ludovic Monnin<sup>1,2</sup>, Thibault Nidelet<sup>1\*</sup>, Jessica Noble<sup>2</sup> and Virginie Galeote<sup>1</sup>

5 <sup>1</sup>SPO, Univ Montpellier, INRAE, Institut Agro, Montpellier, France

6 <sup>2</sup>Lallemand Oenology, Blagnac, France

7 \*Corresponding author: [thibault.nidelet@inrae.fr](mailto:thibault.nidelet@inrae.fr)

## 8 **Abstract**

9 *Saccharomyces cerevisiae*, as the workhorse of alcoholic fermentation, is a major actor of winemaking.  
10 In this context, this yeast species performs alcoholic fermentation to convert sugars from the grape  
11 must into ethanol and CO<sub>2</sub> with an outstanding efficiency: it reaches on average 92% of the maximum  
12 theoretical yield of conversion. Primary metabolites produced during fermentation stand for a great  
13 importance in wine where they significantly impact wine characteristics. Ethanol indeed does, but  
14 others too, which are found in lower concentrations: glycerol, succinate, acetate,  $\alpha$ -ketoglutarate...  
15 Their production, which can be characterised by a yield according to the amount of sugars consumed,  
16 is known to differ from one strain to another. *S. cerevisiae* is known for its great genetic diversity and  
17 plasticity that is directly related to its living environment, natural or technological and therefore to  
18 domestication. This leads to a great phenotypic diversity of metabolites production. However, the  
19 range of metabolic diversity is variable and depends on the pathway considered. In the aim to improve  
20 wine quality, the selection, development and use of strains with dedicated metabolites production  
21 without genetic modifications can rely on the natural diversity that already exists. Here we detail a  
22 screening that aims to assess this diversity of primary metabolites production in a set of 51 *S.*  
23 *cerevisiae* strains from various genetic backgrounds (wine, flor, rum, West African, sake...). To

24 approach winemaking conditions, we used a synthetic grape must as fermentation medium and  
25 measured by HPLC five main metabolites. Results obtained pointed out great yield differences  
26 between strains and that variability is dependent on the metabolite considered. Ethanol appears as  
27 the one with the smallest variation among our set of strains, despite it's by far the most produced. A  
28 clear negative correlation between ethanol and glycerol yields has been observed, confirming glycerol  
29 synthesis as a good lever to impact ethanol yield. Genetic groups have been identified as linked to  
30 high production of specific metabolites, like succinate for rum strains or alpha-ketoglutarate for wine  
31 strains. This study thus helps to define the phenotypic diversity of *S. cerevisiae* in a wine-like context  
32 and supports the use of ways of development of new strains exploiting natural diversity. Finally, it  
33 provides a detailed data set usable to study diversity of primary metabolites production, including  
34 common commercial wine strains.

35

36

### Abbreviations

37 CCM: Carbon Central Metabolism; GM: Genetically Modified; CV: Coefficient of Variation;  $\alpha$ -KG:  
38 Alpha-Ketoglutarate; MLF: Malo-Lactic Fermentation; TCA: Tricarboxylic Acid

39

40

41

42

43

44

45

46

47

48

49

50  
51  
52  
53  
54  
55  
56  
57  
58  
59  
60  
61  
62  
63  
64  
65  
66  
67  
68  
69  
70  
71  
72  
73  
74  
75

## Introduction

Fermented products stand today for a great importance in human society both on an economic and a social point of view. Historically, human and fermentation share a long story: first trace of cereals fermentation has been found in Israel and estimated back to 13000 B.C. (Liu *et al.*, 2018) and the first trace of fermented beverage from rice, honey, and a fruit, is known back to 7000 B.C. in China (McGovern *et al.*, 2004). Since then, fermentation uses have expanded to a wide diversity of processes and products, like food, beverages or more recently biofuels. In alcoholic beverages, alcoholic fermentation is the main step of elaboration and is mostly carried by yeast from the *Saccharomyces* genus, especially *Saccharomyces cerevisiae* species. A perfect example is wine, which is the result of the alcoholic fermentation of grapes or grape juice. In a technological point of view, wine fermentation is the biotransformation of glucose and fructose, existing in equal proportions in grapes, in carbon dioxide and ethanol which brings new characteristics to the product: sensory qualities, stability... Alcoholic fermentation is of high technological interest as well as metabolic importance for *Saccharomyces cerevisiae*. Through the glycolysis, this biological process results in generation of pyruvate and energy in the form of ATP. Pyruvate, which is a central metabolite, is then converted in two steps in ethanol and carbon dioxide, which ensure a quick re-oxidation of enzymatic cofactors used in glycolysis, making alcoholic fermentation the most efficient way to promptly provide energy to the cell (Bakker *et al.*, 2001). Moreover, in typical wine conditions, it is the only way for *S. cerevisiae* to produce ATP, respiration being repressed by the Crabtree effect or impossible due to the absence of dioxygen (De Deken, 1966; Pfeiffer and Morlay, 2014). Both fermentation main products, ethanol and carbon dioxide, are by far the most produced metabolites during alcoholic fermentation and

76 therefore in wine making (Nidelet *et al.*, 2016). A simple way to compare these productions between  
77 species, strains or fermentation conditions is to define a yield, mass or molar, of metabolite produced  
78 by substrate consumed. Ethanol yield of wine fermentation carried by *S. cerevisiae* is known to be  
79 around 0.47 gram per gram of hexoses consumed, which represent 92% of the maximum theoretical  
80 yield (calculated as one mole of glucose give two moles of ethanol) (Tilloy *et al.*, 2015). The major part  
81 of remaining hexoses is used as a carbon source for cell multiplication and production of other  
82 metabolites in minor concentrations, such as glycerol, acetate, succinate, acetaldehyde, etc. These  
83 metabolites count for largely smaller carbon fluxes, but can stand for significant technological value.  
84 Glycerol, which is linked to stress resistance, can impact the mouthfeel of wine from a certain  
85 concentration (Albertyn *et al.*, 1994; Noble and Bursick 1984). It has been identified as the second  
86 most produced metabolite in fermentation and as the flux with the greatest impact on ethanol  
87 production (Goold *et al.*, 2017). Acetate, which is a way to restore redox balance and a metabolic  
88 intermediary, is a major off-flavour linked compound and subject to legal limits (Vilela-Moura *et al.*,  
89 2008). It appears that yields of fermentation metabolites like ethanol, glycerol or acetate are linked  
90 to domestication degree of strains (Tapia *et al.*, 2018).

91 For all compounds, yield values differ among strains and environmental conditions of fermentation  
92 (oxygenation, temperature, nutrients concentrations, presence of other microorganisms...) (Du *et al.*,  
93 2012; Tronchoni *et al.*, 2022) but the range of variation stays very limited for ethanol compared to  
94 biomass or other metabolites. In their work, Nidelet *et al.*, (2016) have compared 43 strains from six  
95 different ecological origins and shown that the coefficient of variation of carbon flux toward ethanol  
96 synthesis following glycolysis and alcoholic fermentation is only between 2 and 3 %. In a contrasting  
97 way, yields of glycerol or acetate have a respective variation around 10 and 30 % while representing  
98 a significantly lower carbon flux for the cell (Camarasa *et al.*, 2011; Nidelet *et al.*, 2016). Generally,  
99 global yields are calculated at fixed points of the fermentation: 80% of hexoses consumed, exponential  
100 phase... One of the reason of these choices is that ethanol yield is not constant during fermentation  
101 and that the flux is difficult to calculate beside the exponential growth phase which is the only stage

102 with a quasi-steady state (Celton *et al.*, 2012; Nidelet *et al.*, 2016; Quirós *et al.*, 2013). However, in a  
103 wine production context, the definition of a yield per strain needs to be done when the fermentation  
104 is completed, which means that all hexoses have been used.

105 Representing a very small percentage of the carbon fluxes in the cell, metabolites with very low  
106 concentrations are produced too. However, they can still have a significant impact on the final  
107 fermented product, like organic acids, higher alcohols and esters, and so their production is  
108 considerably studied (Antonelli *et al.*, 1999; Regodón Mateos *et al.*, 2006).

109 The last thirty years have seen considerable research efforts concentrated on understanding and  
110 impacting primary metabolism, mainly with the aim of reducing the final ethanol content of wines.

111 Besides physical or chemical methods, many microbial strategies have been developed to modify  
112 ethanol production during fermentation. We can cite here genetically modified yeast strains, hybrids  
113 strains, optimisation through adaptive laboratory evolution... (reviewed in Varela and Varela, 2019).

114 Beside this, modulation of the carbon central metabolism (CCM) without disturbing the cell balance  
115 still remains complex to operate in wine context, mostly because of the multigenic character of the  
116 associated traits (Bro *et al.*, 2006; Hubmann, Foulquié-Moreno, *et al.*, 2013; Hubmann, Mathé, *et al.*,  
117 2013; Salinas *et al.*, 2012).

118 Nevertheless, elaborate strategies to develop *S. cerevisiae* strains with a modified glycerol or ethanol  
119 yields in wine fermentation requires to clearly identify the diversity of the CCM metabolism as well as  
120 its constraints and trade-offs.

121 Here we present results from a screening strategy of 51 strains from different origins that aims to  
122 identify the variability of yield of primary fermentation metabolites in laboratory wine-like conditions  
123 among the *S. cerevisiae* species.

124

## 125 **Materials and methods**

### 126 **Strains**

127 51 strains have been used. Information is available in supplementary data (S1).

128 Strains selection has been made considering results from precedent works of the laboratory, with the  
129 aim to have a lot of diversity in fermentation profiles (Camarasa *et al.*, 2011; Legras *et al.*, 2018;  
130 Nidelet *et al.*, 2016). EC1118 has been chosen as a reference strain to estimate block effect.  
131 Genetically modified (GM) and laboratory evolved strains for precise CCM traits have been included  
132 too. Strains were conserved at  $-80^{\circ}\text{C}$  in 20% glycerol YPD medium (10 g/l yeast extract, 20 g/l  
133 peptone, 20 g/l glucose) and cultivated on YPD agar plate (YPD + 20 g/l agar).

### 134 **Genetic groups constitution**

135 Strains from various genetic backgrounds, but all linked to fermented beverages, are represented in  
136 the set, known using previous work on *S. cerevisiae* genome sequencing (Akao *et al.*, 2011; Eder *et al.*,  
137 2018; Fay and Benavides, 2005; Liti *et al.*, 2009; Marsit *et al.*, 2015; Novo *et al.*, 2009; Schacherer *et*  
138 *al.*, 2009). To classify and organise this intraspecific diversity, two works have been used to define the  
139 following genetic groups: wine, rum, West African, sake and flor (Legras *et al.*, 2018; Peter *et al.*, 2018).  
140 Genomic data to establish these groups are available for 39 strains. Strains without information have  
141 been labelled as “Unknown”. A supplementary group, labelled as “Miscellaneous”, has been used to  
142 gather strains with mosaic, very singular or unclassifiable genomes, but it will not be used as a  
143 consistent group like others.

### 144 **Fermentation conditions**

145 Fermentation conditions have been chosen to ensure a quick and complete alcoholic fermentation.  
146 One colony has been grown on an overnight culture of YPD medium as pre-culture. Then  $10^6$  cells/ml  
147 of these pre-culture have been inoculated in a 280 ml fermenter. A synthetic medium that mimics  
148 grape must composition has been used containing 90g/l of glucose, 90 g/l of fructose, 425 mg/l of

149 assimilable nitrogen (as a mixture of amino acids and ammonium) and a set of nutrients reflecting  
150 grape juice composition (Bely *et al.*, 1990). Fermentations have been carried at 28°C with agitation.  
151 Fermenter weight has been measured twice a day to observe fermentation progress. Fermentations  
152 carried at the same time represent a fermentation block. Three replicates have been made for each  
153 strain (except LMD17, LMD37, LMD39, performed in six replicates due to their use in a parallel project  
154 and EC1118 performed in duplicate per block, *i. e.* 28 replicates in total).

### 155 **Metabolite analysis**

156 Fermentation metabolites concentrations have been measured using high performance liquid  
157 chromatography as described in Deroite *et al.* (2018) and analysing chromatograms on OPEN LAB 2X  
158 software. Fermentation samples have been centrifuged 5 min at 3500 rpm at 4 °C and kept at -18°C.  
159 Before analysis, samples have been diluted to 1/6 with 0.005 N H<sub>2</sub>SO<sub>4</sub> and then centrifuged 5 min at  
160 13000 rpm at 4 °C. The supernatant has been kept at -18°C until being analysed. The HPLC method  
161 allows to measure concentrations of glucose, fructose, ethanol, glycerol, acetate, succinate, pyruvate  
162 and alpha-ketoglutarate. Analyses were performed in duplicate and the mean has been calculated for  
163 each sample and used in results analysis.

164 Quantification has been made with a Rezex ROA column (Phenomenex, Torrance, California, USA) set  
165 at 60 °C on a HPLC (HPLC 1260 Infinity, Agilent Technologies, Santa Clara, California, USA). It has been  
166 resolved isocratically with 0.005 N H<sub>2</sub>SO<sub>4</sub> at a flow rate of 0.6 mL/min. Concentration of acetate and  
167 pyruvate have been measured with a UVmeter at 210 nm and other compounds with a refractive  
168 index detector at 35°.

169

170 For each fermentation, two measures have been done: in the must before fermentation (done for  
171 each block) and at the end of the fermentation. All analyses have been conducted on finished  
172 fermentation, *i.e.* when combined fructose and glucose concentration fall under 3 g/l, or when  
173 fermenter weight stays constant during 24h.

174 Yield has been calculated for each metabolite as following:

175

$$176 \quad Y_{metabolite} = \frac{C_{metabolite}}{C_{glucose+fructose;initial} - C_{glucose+fructose;final}}$$

177

178 Each concentration is expressed in g/l or mg/l, leading to yields expressed in g/g or mg/g. When  
179 necessary, values of yield are expressed as follows: mean  $\pm$  standard error.

### 180 **Statistical analysis**

181 Statistical analysis has been made using R studio software (version: 1.4.1106). The R script used for  
182 analysis is available as supplementary data (S3) as well as the raw data set (S2) and the final ones that  
183 arose from the analysis (S4 and S5).

184

185 EC1118 has been used in each block in order to evaluate a possible block's effect. It has been  
186 estimated on EC1118 data using the following model:

$$187 \quad Y_{lm} = \mu + Block_l + E_{lm}$$

188

189 With:  $Y$  the phenotype (yield for a given metabolite) for the block  $l$  (1-51) and the replicate  $m$  (1-2).  $\mu$   
190 represent the mean of the considered phenotype and  $E$  the residual error, with  $E \sim N(0, \sigma^2)$ .

191

192 A block effect has been observed on EC1118 data. This has been corrected by calculating a variation  
193 factor on EC1118 metabolite values. This correction (raw value - correction coefficient) has been  
194 applied on glucose, fructose, ethanol, glycerol, succinate, acetate and alpha-ketoglutarate  
195 concentrations data for all strains following their fermentation block.

196

197 The block effect being exempted yields can be expressed with the following model:

198



199 
$$Y_{ik} = \mu + S_i + E_{ik}$$

200

201 
$$Y_{jk} = \mu + G_j + E_{jk}$$

202

203 
$$Y_{ijk} = \mu + G_j + S_i(G_j) + E_{ijk}$$

204

205 With:  $Y$  the phenotype (yield for a given metabolite) corrected for block effect for the strain  $i$  (1-51),  
206 the genetic group  $j$  (1-5) and for the replicate  $k$  (1-28).  $\mu$  represent the mean of the considered  
207 phenotype,  $S$  the effect of the strain  $i$ ,  $G$  the effect of the genetic group  $j$  and  $E$  the residual error, with  
208  $E \sim N(0, \sigma^2)$ .

209

210 To express the variation of yield of a metabolite among a group of strains, the variation coefficient has  
211 been used (Albatineh *et al.*, 2014). A correction according to the number of strains in a group has been  
212 applied, allowing us to compare groups of different sizes. The correction has been applied as follows:

213

214 
$$CV_{corr} = \frac{\sigma}{\mu} \times \left( 1 - \frac{1}{4(n-1)} + \frac{1}{n} \left( \frac{\sigma}{\mu} \right)^2 + \frac{1}{2(n-1)^2} \right) \times 100$$

215

216 With, for a group of strains and a metabolic yield:  $\mu$  the mean,  $\sigma$  the standard deviation,  $n$  the size of  
217 the group and  $CV_{corr}$  the corrected coefficient of variation, expressed as percentage.

218

## 219 **Results**

220

221 Here we present results obtained for 51 strains following the fermentation of a synthetic grape must.  
222 Concentrations have been measured for 5 main compounds from the CCM: ethanol, glycerol,  
223 succinate, acetate and alpha-ketoglutarate, determined by HPLC. After a correction of block effect and

224 yield calculation for each compound (expressed as gram of metabolite measured per gram of hexoses  
225 consumed), strains have been compared between each other. All strains have been able to consume  
226 entirely glucose and fructose from the must within 5 days.

227 We detail the analysis of the 51 strains set of the metabolic yields for 5 metabolites a global analysis  
228 by PCA, an analysis of correlation between metabolic yields and the impact of strains' genetic origins.  
229 Among our set of strains, 5 have been genetically modified or obtained using adaptive laboratory  
230 evolution methods aiming to modify the CCM: 5074, LMD13, LMD14, LMD41 and LMD45. These  
231 strains will be used as a sort of control and will be discarded in correlation studies between  
232 metabolites, the 46 other strains being gathered in a group called "wild".

### 233 **Ethanol**

234 In the first place, we took a look at the major produced metabolite during alcoholic fermentation:  
235 ethanol (Figure 1). We observed significant differences of yield between all strains. ( $F_{50, 136} = 38.8$ , p-  
236 value  $\ll 10e-3$ ). The highest producer of ethanol, the strain LMD41, with a yield of  $0.4978 \pm 0.0005$   
237 g/g, is a GM strain optimised to maximise ethanol production while reducing glycerol synthesis in  
238 bioethanol context. The lowest ethanol producer is the strain 5074, with a yield of  $0.4368 \pm 0.0008$   
239 g/g, a haploid segregant obtained by an adaptive evolution strategy aiming at reducing ethanol  
240 production while increasing glycerol. Results from this evolution have been used to build the second  
241 lowest producer of ethanol: the commercial wine strain LMD14, which shows a yield value of  $0.4515$   
242  $\pm 0.0007$  g/g.

243 For wild strains, ethanol yield values are all contained in a smaller range: between 0.47 and 0.49 g/g,  
244 but still show significant differences ( $F_{45, 126} = 7.3585$ , p-value  $\ll 10e-3$ ). This range represents a  
245 variation inferior to 4%, with concentrations between 80.7 g/l for the lowest producer and 83.9 g/l for  
246 the highest.

247 Correlation between ethanol yield and genetic group belonging of strains has been studied. We used  
248 for that only values of strains from defined and homogenous groups: wine, flor, rum, sake and west

249 African. Means of each group have been calculated for each metabolite, using the average values of  
 250 all strains included in the group.  
 251 No significant difference of yield between genetic groups has been observed ( $F_{4, 27} = 0.1448$  and  $p$ -  
 252 value = NS).

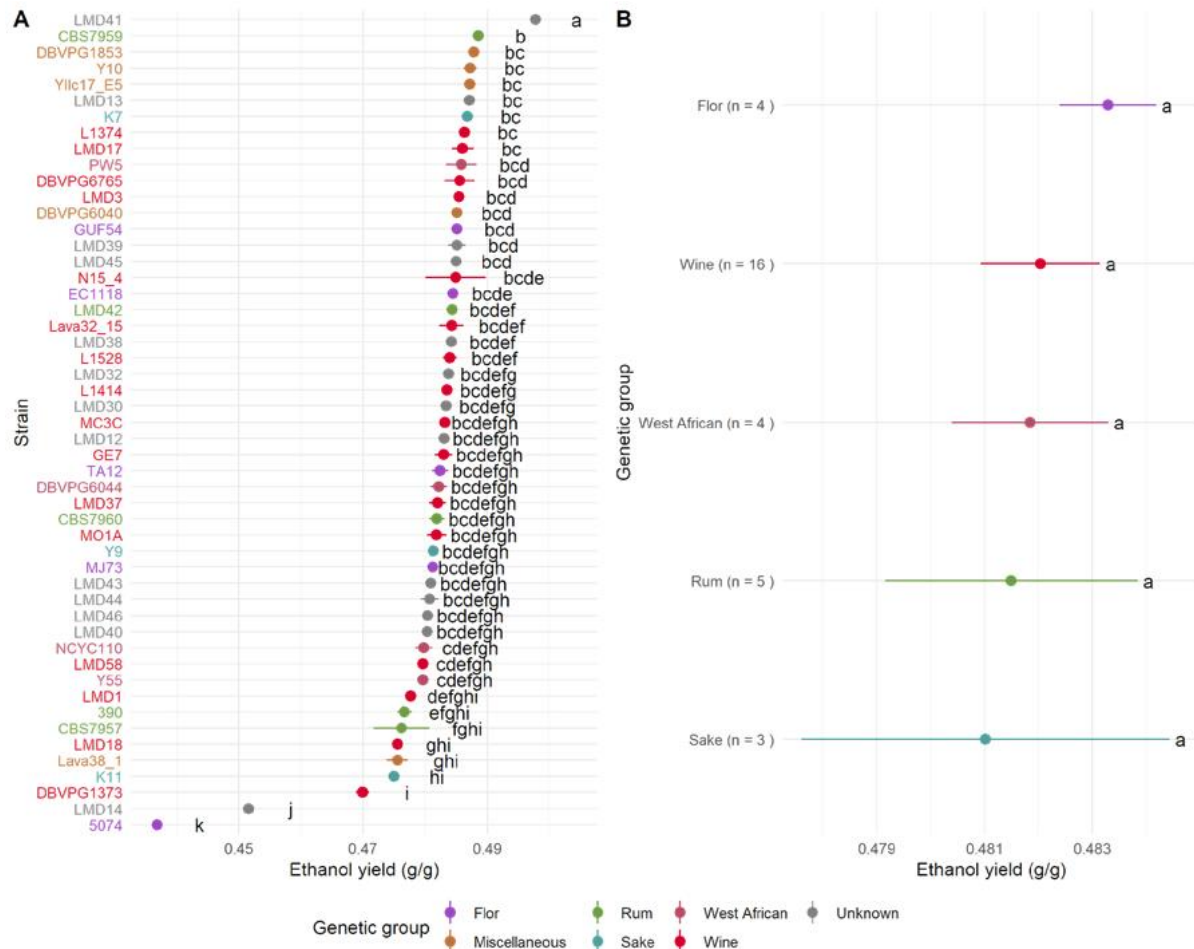

253  
 254 **Figure 1 - Average ethanol yield for each strain (A) and for main genetic groups (B)**  
 255 *Standard error as error bars. Different letters represent significant differences between two means*  
 256 *(Tukey's test,  $p < 0.05$ )*

## 257 Glycerol

258 The second more important metabolite by flux in CCM is known to be glycerol. Results can be seen in  
 259 Figure 2. Here, yield values are distributed between 0.092 and 0.025 g/g considering all strains, and  
 260 between 0.032 and 0.049 g/g considering only wild strains, with in both cases significant differences  
 261 between strains (with respectively  $F_{50, 136} = 504.77$  and  $F_{45, 126} = 75.403$  and  $p$ -values  $\ll 10e-3$  for both).

262 The haploid segregant obtained following an adaptive laboratory evolution aiming to improve glycerol  
 263 production (strain 5074) is the strain with the highest glycerol yield:  $0.0914 \pm 0.0005$  g/g. It is followed  
 264 by the commercial high glycerol producing strain LMD14 with a yield of  $0.0723 \pm 0.0016$  g/g.  
 265 The genetically modified strain LMD41, with maximised ethanol production and reduced glycerol  
 266 production, is the one producing the lowest glycerol, with a yield below 0.03 g/g. Another modified  
 267 strain, LMD45 shows a similar glycerol yield: it has been built for low by-product production, which  
 268 means low glycerol and acetate yields.  
 269 As detailed for ethanol, we looked for correlation between strains' genetic origin and glycerol yield.  
 270 No significant difference between genetic groups has been observed for glycerol yield ( $F_{4, 27} = 0.585$ ,  
 271 p-value = NS).

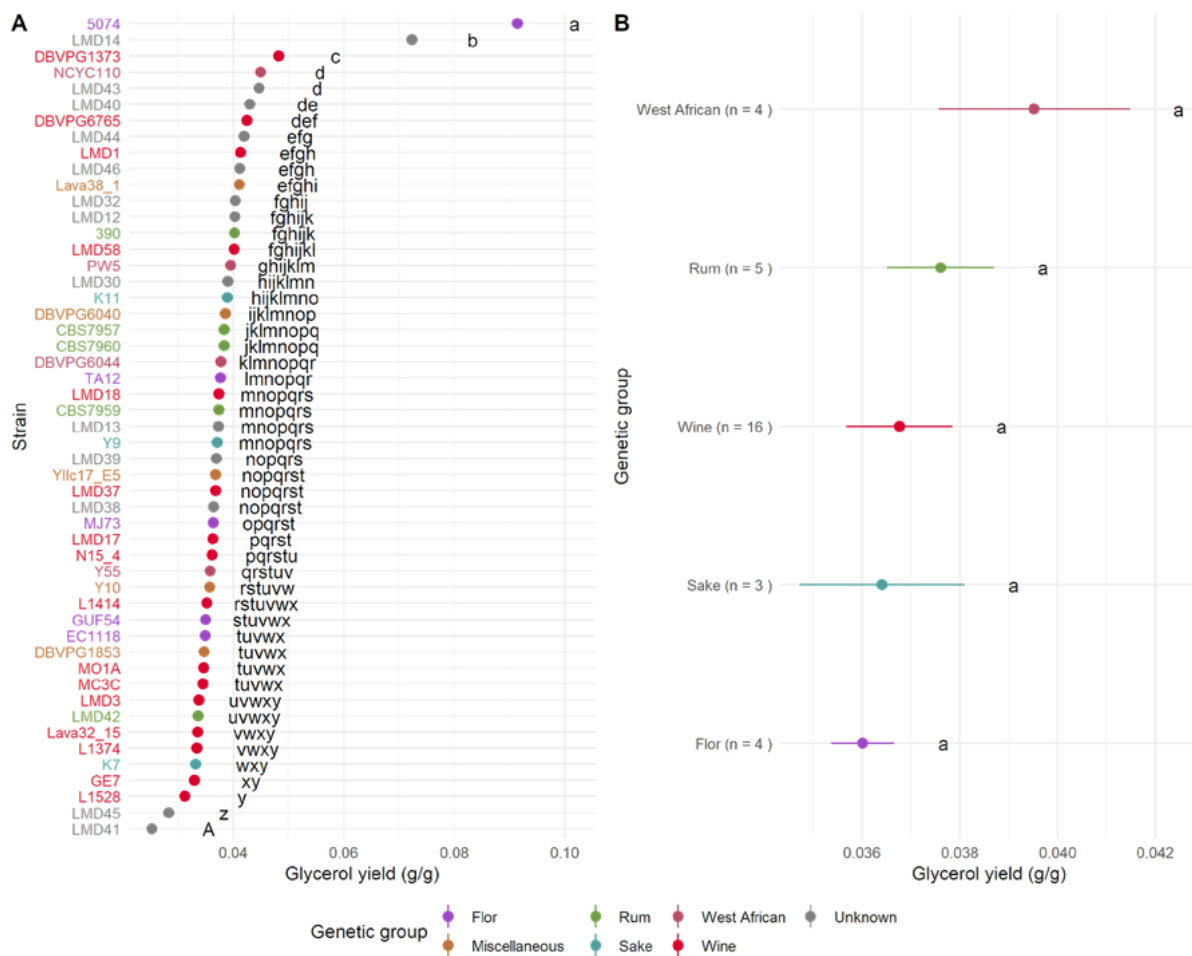

272

273 **Figure 2** - Average glycerol yield for each strain (A) and for main genetic groups (B)

274 *Standard error as error bars. Different letters represent significant differences between two means*

275 *(Tukey's test,  $p < 0.05$ )*

276 **Acetate**

277 Acetate is an important metabolite in wine context: it's the third most produced metabolite in  
278 fermentation after ethanol and glycerol and, besides its low concentration, it is directly linked to off-  
279 flavour and subject to legal limits. Thus, its production is always characterised in wine strains studies.  
280 Results can be seen in Figure 3. Significant differences have been observed between strains of our set,  
281 all strains taken into account or only wild ones (respectively  $F_{50, 136} = 444.66$  and  $F_{45, 126} = 441.49$ , both  
282 p-values  $\ll 10e-3$ ).

283 Acetate yields are included in a range of 0.6 to 7.9 mg/g, with a mean of  $3.41 \pm 0.23$  mg/g. We can  
284 observe a great diversity for acetate yield among strains, with many strains significantly different from  
285 each other. The highest acetate producer is Yllc17\_E5 with a yield culminating at  $7.85 \pm 0.28$  mg/g.  
286 This yield value corresponds to a concentration of 1.35 g/l of acetate, which places this strain above  
287 the maximum limit in wine.

288 LMD45, known as a genetically modified strain for low fermentation by-product, shows the second  
289 lowest acetate yield:  $0.68 \pm 0.02$  mg/g, which is a value more than 10 times lower than the highest  
290 acetate producer of the set.

291 In an interesting way, our two extreme strains for ethanol and glycerol yields are extremely close with  
292 a medium acetate yield.

293 Contrary to previous metabolites, the strains' genetic origins have a significant effect on acetate yield  
294 (p-value = 0.019). Indeed, we spotted that flor and west African strains, with an average yield of  
295 respectively  $4.53 \pm 0.53$  mg/g and  $4.74 \pm 0.81$  mg/g, have higher acetate yield than wine strains with  
296  $2.69 \pm 0.32$  mg/g.

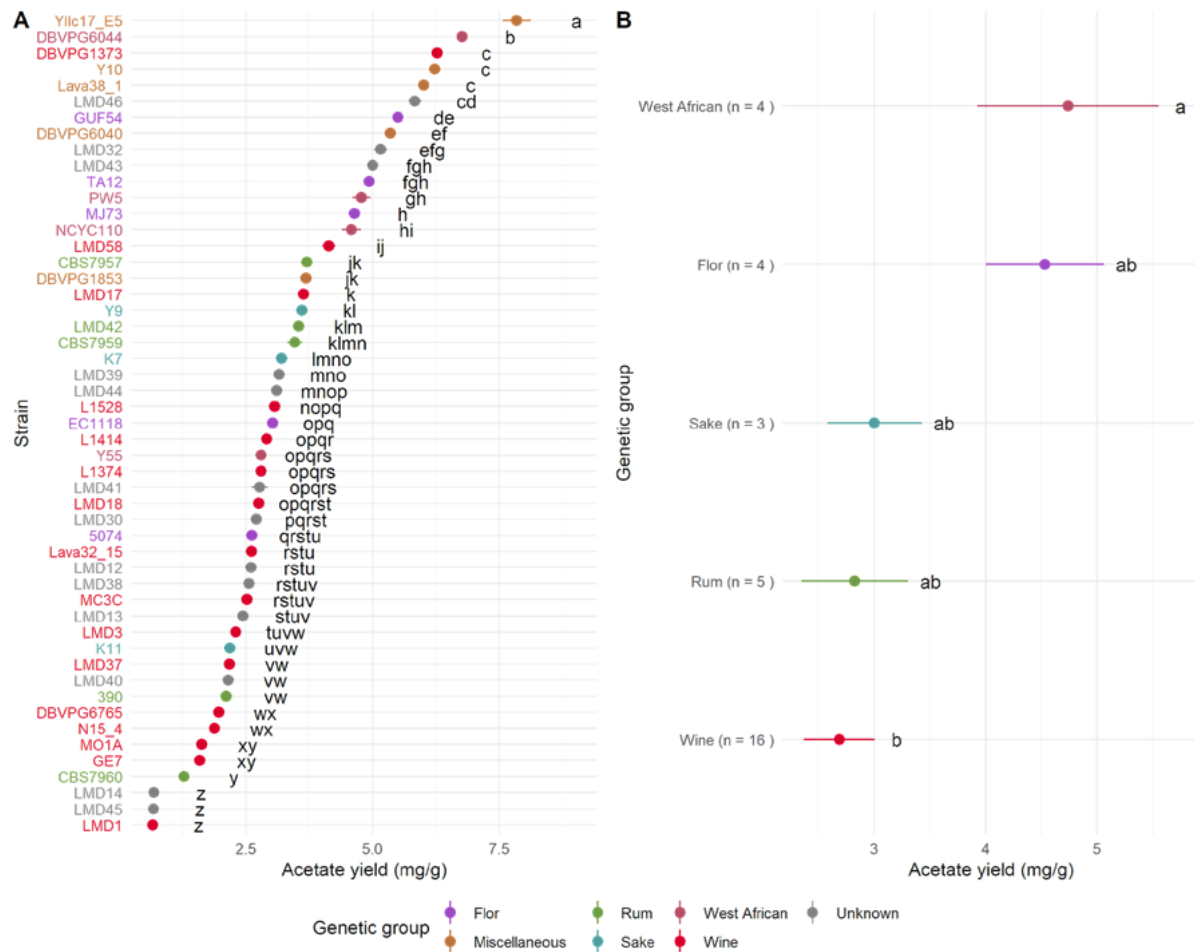

297

298 **Figure 3** - Average acetate yield for each strain (A) and for main genetic groups (B)

299 *Standard error as error bars. Different letters represent significant differences between two means*

300 *(Tukey's test,  $p < 0.05$ )*

### 301 Succinate

302 Succinate can be seen as a metabolite with positive impact in wine, but is rarely considered due to its  
303 low production by wine yeast.

304 Succinate yield values show significant differences between strains too ( $F_{50, 136} = 61.8$  with all strains  
305 and  $F_{45, 126} = 61.1$  with only wild ones,  $p$ -value  $\ll 10e-3$  for both) (Figure 4).

306 These values range from 3.1 to 32.8 mg/g, with GUF54 as the lowest producer and LMD41 as the  
307 highest. These yield values correspond to concentration ranging from 0.54 to 5.62 g/l.

308 A large part of the strain set has low and non-significant differences of succinate yield, except the  
309 three higher producers, LMD41, LMD44 and LMD43, that show a gap with the rest of the set. The

310 highest yield measured is LMD41 with  $32.8 \pm 3.8$  mg/g. As for acetate, we also highlighted a significant  
 311 impact of strains' genetic origins on succinate yields ( $F_{4, 27} = 4.8$ , p-value = 0.005). Rum strains, with a  
 312 yield of  $8.4 \pm 1.2$  mg/g produce more succinate than flor strains that show an average yield of  $4.0 \pm$   
 313  $0.5$  mg/g (p-value = 0.016, obtained with a Welch two sample t-test).

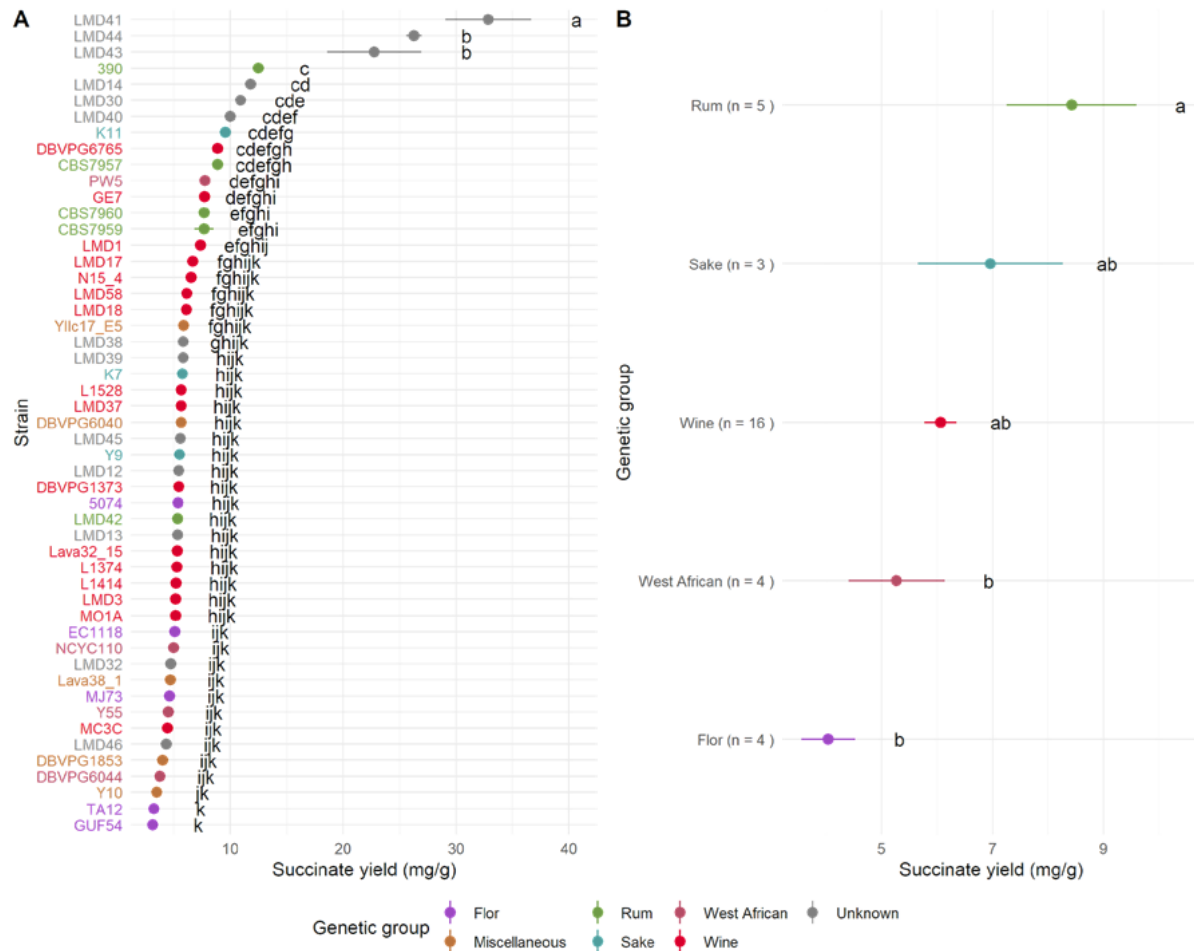

314  
 315 **Figure 4** - Average succinate yield for each strain (A) and for main genetic groups (B)  
 316 Standard error as error bars. Different letters represent significant differences between two means  
 317 (Tukey's test,  $p < 0.05$ )

318  **$\alpha$ -ketoglutarate**

319  $\alpha$ -ketoglutarate ( $\alpha$ -KG) is a low concentration metabolite of the CCM produced during fermentation,  
 320 but stands for a great importance in the nitrogen metabolism, especially in wine fermentation. In our  
 321 set, significant differences of  $\alpha$ -KG yield between strains can be observed ( $F_{50, 136} = 72.103$  for all strains  
 322 and  $F_{45, 126} = 47.299$  for wild ones, both p-values  $\ll 10e-3$ ). Values of yield range between 0.08 mg/g

323 and 2.7 mg/g with the highest producer being by far LMD14 ( $2.69 \pm 0.16$  mg/g) and the lowest  
 324 DBVPG6044 ( $0.09 \pm 0.03$  mg/g) (Figure 5).

325 A correlation between genetic groups and  $\alpha$ -KG yield have been spotted too ( $F_{4, 27} = 6.23$ , p-value =  
 326 0.001). Indeed, wine strains are higher producers of  $\alpha$ -KG compared to rum, sake, or flor strains.

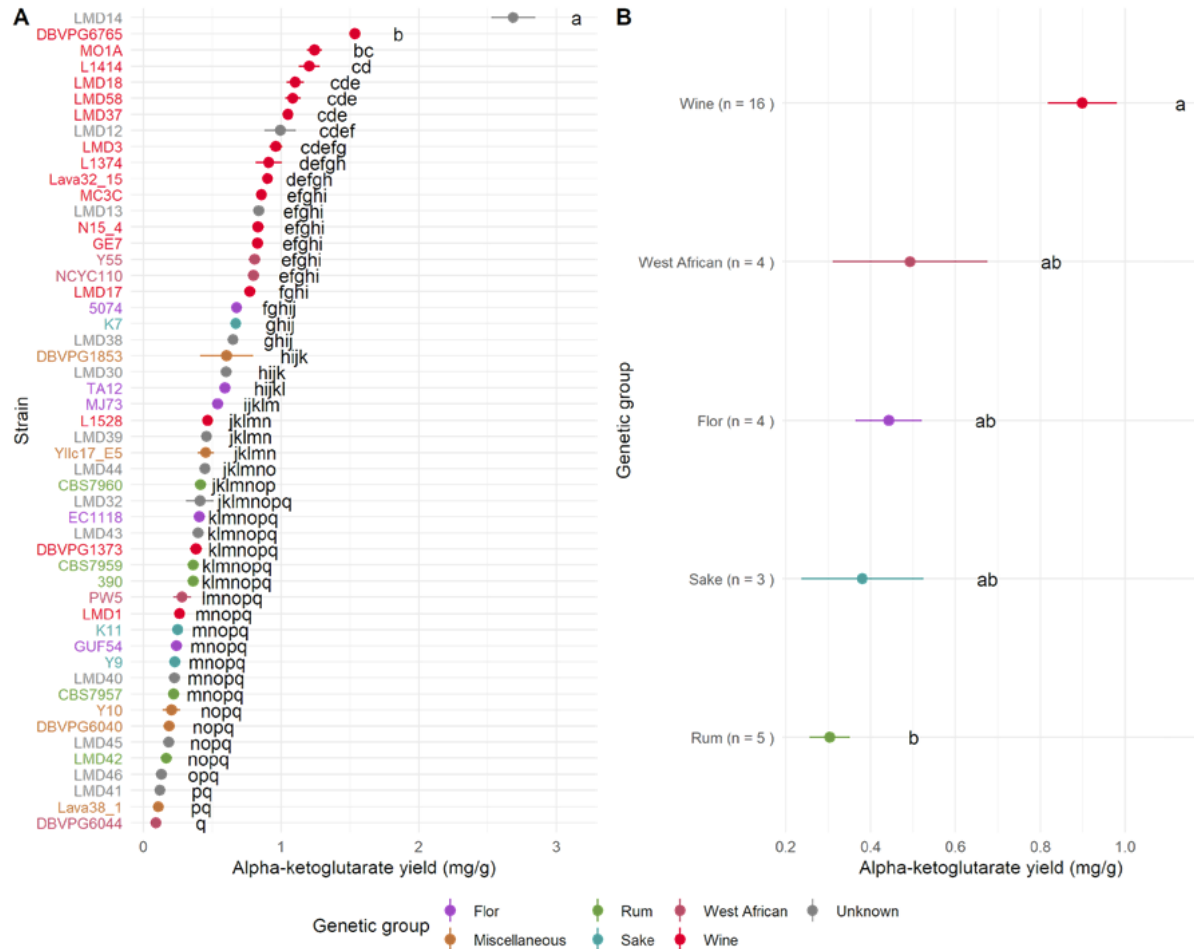

327  
 328 **Figure 5 - Average  $\alpha$ -ketoglutarate yield for each strain (A) and for main genetic groups (B)**  
 329 *Standard error as error bars. Different letters represent significant differences between two means*  
 330 *(Tukey's test,  $p < 0.05$ )*

331 **Comparison of all metabolites yield variation**

332 In the aim to have a better comparison of metabolic yields between them and between strain groups,  
 333 we decided to calculate the coefficient of variation for each metabolite (Figure 6).

334 With a variation coefficient of 1.8% when all strains are considered, ethanol is the metabolite with the  
 335 yield presenting the lowest variation. With only wild strains, the coefficient of variation is even lower,



336 dropping to 0.9 %. Other metabolites have a more important variation among our selection of strains,  
337 with a peak for succinate and alpha-ketoglutarate around 75%. Overall, variation is higher when all  
338 strains are considered. Acetate is the only exception, with a similar coefficient of variation for all  
339 strains group and wine group (respectively 48 and 47 %).

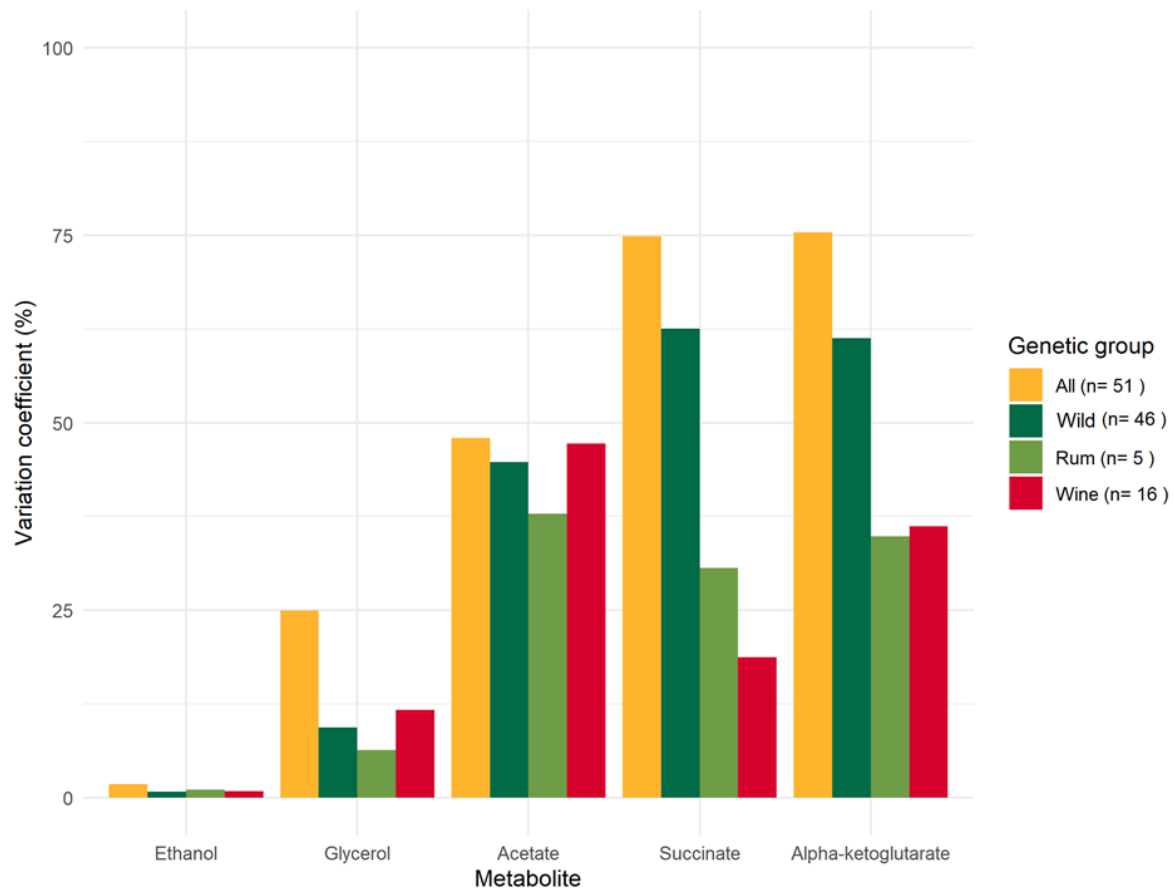

340  
341 **Figure 6** - Variation coefficient of each metabolite for all strains, wild strains, wine strains and rum  
342 strains

343 *Calculated using all replicates means of each strain for rum, wine, natural and all strains groups*

#### 344 **Metabolic yields correlation**

345 After considering metabolic yields one by one, correlations between them have been looked at. The  
346 strongest one is a negative correlation between glycerol and ethanol yields in the complete set of  
347 strains ( $R^2 = 0.859$ ,  $F_{1,49} = 297.7$ ,  $p\text{-value} \ll 10e\text{-}3$ ). However, this correlation seems driven by modified

348 and evolved strains because of their extreme yield values. Without these strains, the correlation is still  
 349 relevant but with a larger dispersion ( $R^2 = 0.332$ ,  $F_{1,44} = 21.86$ ,  $p\text{-value} \ll 10e-3$ ) (Figure 7).

350 Correlation have been identified too for others metabolic yields :

- 351 - A positive correlation exists between glycerol and succinate yields if we consider only wild  
 352 strains ( $F_{1,44} = 9.0559$ ,  $p\text{-value} = 0.0043$ ) but with a very high dispersion ( $R^2 = 0.1707$ )
- 353 - A negative correlation exists between acetate and alpha-ketoglutarate yields both in all strains  
 354 and wild strains sets (respectively  $F_{1,49} = 12.2$  and  $F_{1,44} = 12.55$ ,  $p\text{-value} = 0.00102$  and  $0.00095$ ),  
 355 but again with very high dispersion (respectively  $R^2 = 0.1994$  and  $R^2 = 0.2219$ ).

356 No other significant correlation has been observed between metabolic yields, considering all strains  
 357 or only wild ones.

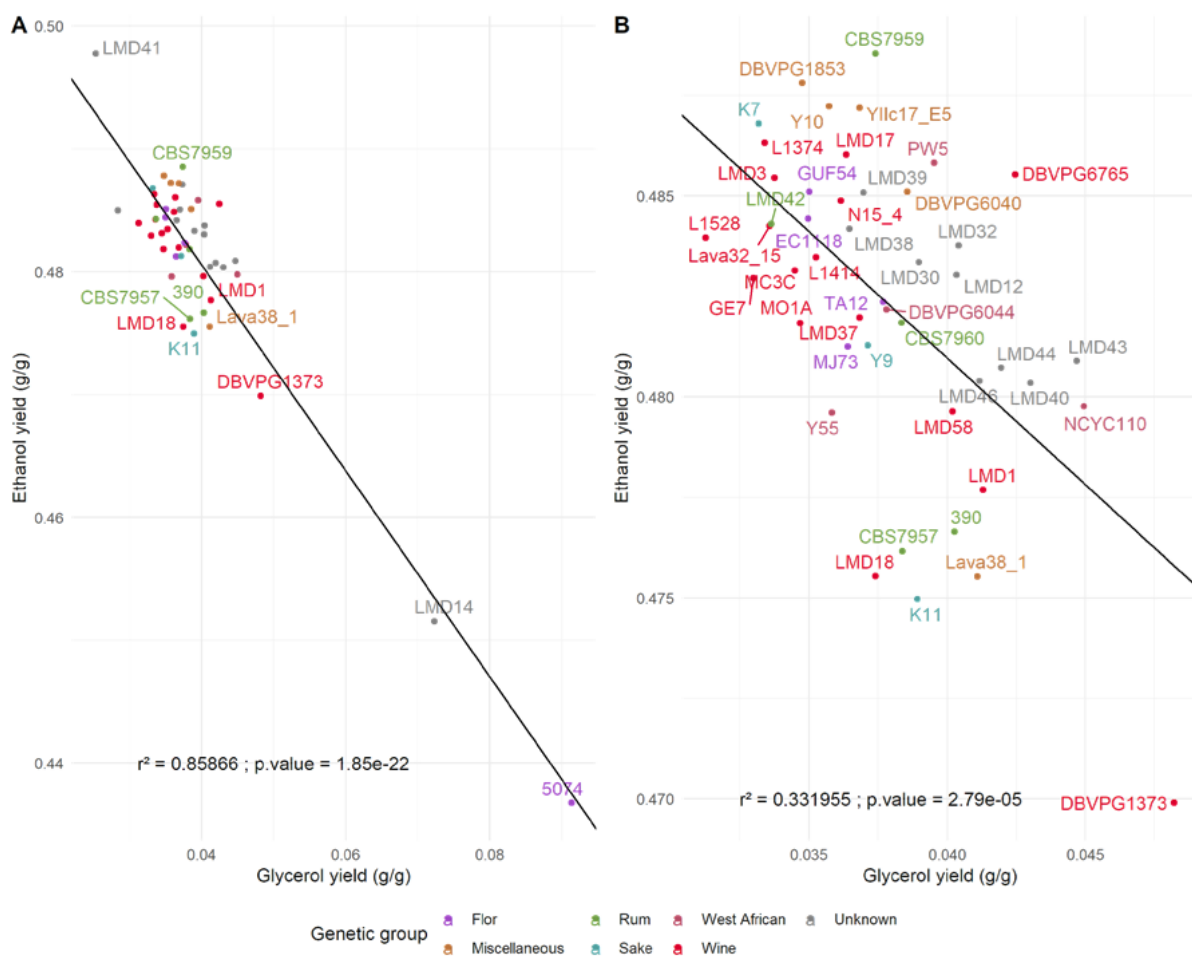

358  
 359 **Figure 7** - Relation between ethanol and glycerol yields, all strains considered (A) or only wild strains  
 360

(B)

## 361 **Global analysis and hierarchical clustering**

362 To obtain a global view of our data set, a Principal Component Analysis (PCA) has been performed  
363 with yields values of ethanol, glycerol, acetate, succinate and alpha-ketoglutarate (Figure 8). This  
364 analysis allows us to situate strains in relation to each other and investigate the effect of the genetic  
365 background. PCA has been performed with only wild strains to avoid bias induced by GM and evolved  
366 strains. We also performed a Hierarchical Clustering on Principal Components (HCPC) on wild strains,  
367 allowing us to define 4 clusters of strains. We chose this number because it is the smallest that better  
368 represents the distribution. The clustering showed a good superposition with the genetic group and  
369 reflects observations already made in metabolite by metabolite analysis. For example, the wine strains  
370 group is quite homogenous and seems mainly driven by the alpha-ketoglutarate and acetate yields  
371 (except the strain DBVPG1373). The first cluster gathers almost all wine strains (except DBVPG1373).  
372 LMD1, which is a wine strain, is located in cluster 3 but is very close to cluster 1 in PCA representation.  
373 The second cluster gathers 3 flor strains, EC1118 being located closer to wine strains, in cluster 1. The  
374 third cluster represents strains with no relation with each other and which are quite dispersed. The  
375 last cluster is only composed of 2 strains, that are characterised by their very high yield of succinate:  
376 LMD44 and LMD43. Sake, rum and west African groups don't show any consistency in clustering. Strain  
377 LMD12, LMD30, LMD38 and LMD39, which are commercialised for wine fermentation, are clustered  
378 with wine genetic strains. The last commercial wine strain, LMD32, is clustered with flor strains.

379  
380 In variable representation, negative correlation of glycerol and ethanol can be seen. Acetate, succinate  
381 and  $\alpha$ -KG appear to be not or weakly correlated with glycerol or ethanol, enforcing the idea that their  
382 variations are more related to genetic groups specificities than to major CCM fluctuations.

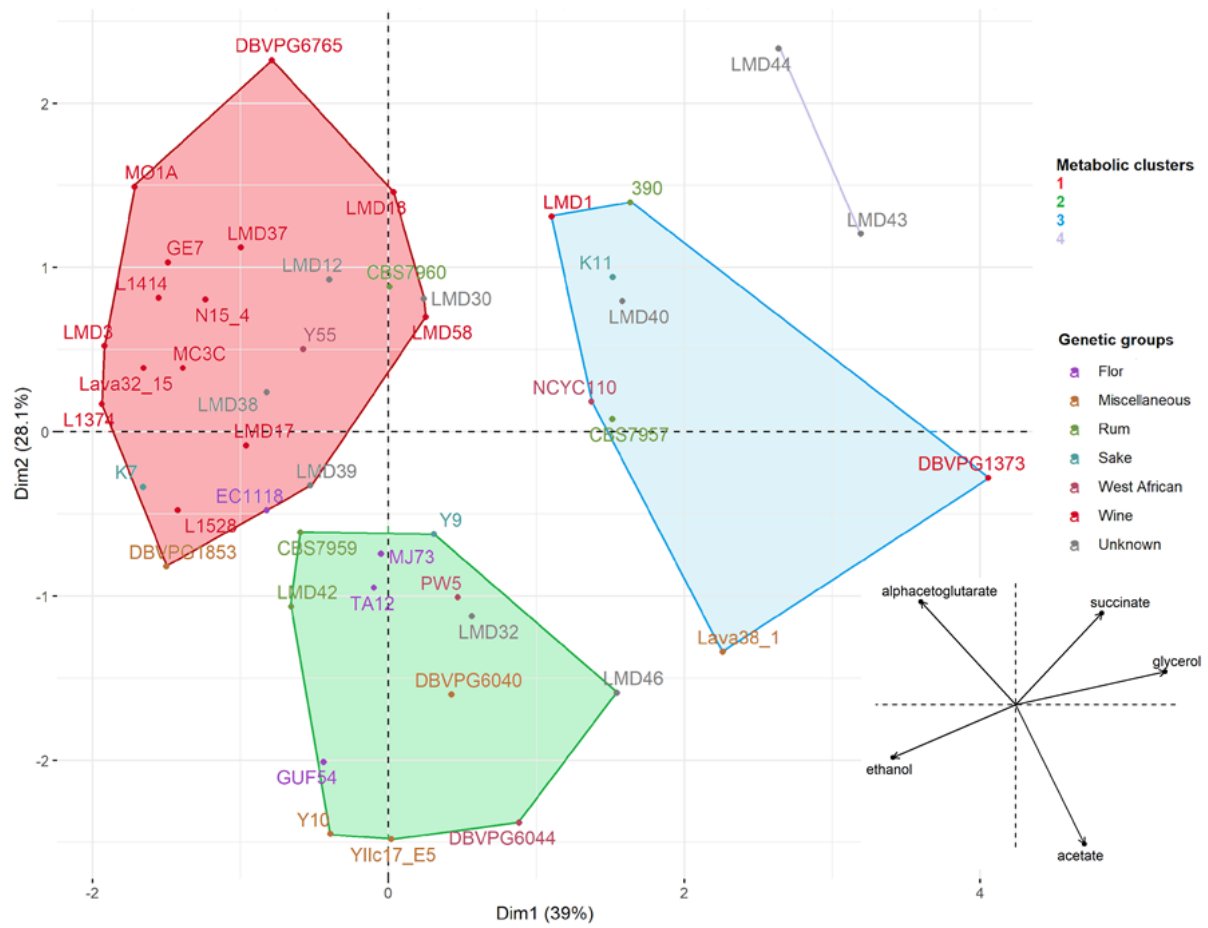

383

384

385

386

387

388

389

390

391

392

393

394

395

**Figure 8** - Principal Component Analysis on natural strains for ethanol, glycerol, acetate, succinate and  $\alpha$ -KG yields, individual and variable plot, with Hierarchical Clustering on Principal Components. Coloured points represent strain, tinted by origin. 4 clusters have been defined: 1 (red), 2 (green), 3 (blue) and 4 (purple)

## Discussion

Our analyses on a diverse set of strains allow us a broad view of primary metabolic diversity. As it has already been observed, our results confirm our main hypothesis: wild variations exist among the *Saccharomyces cerevisiae* species concerning yields of primary metabolites and our experimental design allows us to assess it. Moreover, this methodology brings more accuracy in metabolic yield assessment and generates robust and standardised data that can be reused in other studies on yeast

396 metabolism. It allows to precisely define yields in a wine-like context, using synthetic gape must with  
397 metabolite assessment at fermentation final stage.

398 The medium used in this study is a very close imitation of grape must, so it is perfectly suited to study  
399 wine strain metabolism, but also for every strain able to ferment a complex medium with high sugar  
400 concentrations (Bely *et al.*, 1990). The use of an internal reference, the strain EC1118, adds another  
401 advantage: new strains can be added in the set as long as the same reference is used in each  
402 fermentation block and in the same fermentation conditions.

403 Time of fermentation being dependent of nitrogen level and temperature, we carried fermentation at  
404 28°C with a must containing a relatively low concentration of sugars and a high concentration of  
405 usually limiting nutrients (assimilable nitrogen, vitamins, anaerobic growth factors...) to ensure a quick  
406 and total hexose conversion to ethanol (Rollero *et al.*, 2015). These conditions allow fermentations to  
407 be completed within 3 days.

408 Our methodology allows a medium throughput screening, which is a good balance between  
409 phenotyping a large number of strains and having a high accuracy measure enabling to distinguish  
410 traits with low variation.

411 GM or evolved strains have also been included in the selection as a kind of “controls”. Indeed, these  
412 five strains have been selected for defined characteristics linked to the CCM. . We observed that the  
413 two strains which show the highest glycerol yield and the lowest ethanol yield among all strains are  
414 LMD14 and 5074. Both are strains obtained following an adaptive evolution aiming to reduce their  
415 ethanol production while enhancing glycerol (Tilloy *et al.*, 2014). At the other end of the spectrum,  
416 LMD41, modified to enhance ethanol production while cutting glycerol production, represents the  
417 highest value of ethanol yield and the lowest for glycerol. Finally, the last GM strain, LMD45, shows  
418 the second lowest acetate and glycerol yields, which is consistent with its modifications aiming to  
419 reduce fermentation by-product synthesis. All these features clearly represent the already known  
420 characteristics of the selected strains, for which they have been modified or evolved, and validate our  
421 methodology.

422 If we compare metabolites with each other, great differences of yield exist. Ethanol is the most  
423 produced compound, with a yield ten times higher than glycerol, which has a yield ten times higher  
424 than acetate.  $\alpha$ -ketoglutarate has the lowest yield values but is still close to acetate. Significant  
425 variations of yield have been assessed between strains, wild or not, for each metabolite, proving that  
426 our conditions allow us to discriminate strains between them for their primary metabolite yields.  
427 However, variations among yields are not equal and differ depending on the considered metabolite.  
428 Ethanol and glycerol are the most produced metabolites during alcoholic fermentation. With a  
429 variation coefficient inferior to 2%, ethanol yield shows a very low variation, and even less considering  
430 only wild strains. Glycerol yield varies more than ethanol, showing a variation coefficient around 25%,  
431 allowing a better differentiation of strains in a set. The same variation ranking can be observed in  
432 Nidelet *et al.* (2016) results, obtained in a similar medium using 43 strains (including 20 common to  
433 our set), with ethanol being the most constant flux, followed by glycerol and then acetate, succinate  
434 and  $\alpha$ -KG as the most variable. This observation can be found in many other different works about  
435 CCM too. Tronchoni *et al.* (2022), performed a screening in wine-like media in aerobic conditions using  
436 25 *S. cerevisiae* strains. Ethanol yields are lower than our results, that is consistent with aerobic  
437 conditions, but the range of variation is very similar: no great observable differences and significant  
438 differences only between strains with extreme values. Another comparable screening can be found in  
439 the work of Nieuwoudt *et al.* (2006) on 15 strains (commercial or not) and 19 hybrids. Fermentation  
440 media used are natural and synthetic laboratory must. On both media, similar results have been  
441 obtained: a higher range of variation is observable for glycerol than for ethanol. As well, Hubmann,  
442 Foulquié-Moreno, *et al.* (2013) performed a relevant screening on 52 beer and distillery *S. cerevisiae*  
443 strains for their ethanol and glycerol yields, on a YPD like medium. All these data present a larger  
444 diversity between strains for glycerol than for ethanol.  
445 Even if their yield values and variations are different, literature demonstrates a clear negative  
446 correlation between ethanol and glycerol productions or yields and our data show that this correlation  
447 is visible but not obvious in a small range of yield, represented here by wild strains. The correlation is

448 clearer when extreme values from modified and evolved strains are considered, but three values  
449 (strains 5074, LMD14 and LMD41) are driving it.

450 No relation between genetic group belonging and yield of glycerol or ethanol have been found in our  
451 data. This goes against precedent observation that states wine strains are defined as high glycerol  
452 producers compared to other groups (Camarasa *et al.*, 2011). Nevertheless, it is worth noting that in  
453 the study of Camarasa *et al.* (2011), groups are based on the environmental origin and our groups on  
454 genetic origin, and that these two origins don't always match (as an example, strain Y55 used to be  
455 classified as a laboratory strain isolated from a wine environment, but Liti *et al.* (2009) showed that  
456 this strain is in fact closer to a West African genetic lineage).

457 Globally, glycerol, considering its concentration and variation range and the strong negative  
458 correlation with ethanol yield, is confirmed to be the best candidate to impact carbon fluxes in the  
459 cell.

460

461 Succinate is produced in minor concentrations compared to ethanol or glycerol and its production  
462 doesn't seem correlated with them. However, it shows a larger diversity of yield. Succinate is one of  
463 the metabolites with the widest range of variation according to its yield, but this variation is mainly  
464 driven by exceptionally high producing strains LMD41, LMD44 and LMD43, all commercially used in  
465 bioethanol production. This result goes against the main goal of maximising ethanol production  
466 without by-products, but high succinate production can be explained by the antibacterial character of  
467 this metabolite (particularly against lactic acid bacteria). This trait has been selected over-time to limit  
468 contamination which can reduce the global yield of the bioethanol production process (the so-called  
469 "rum" group contains numerous Brazilian bioethanol strains) (Dorta *et al.*, 2005; Dong *et al.*, 2015).  
470 High succinate yield has been observed on wild strains with known genetic group affiliation, but two  
471 of the highest succinate producers are the commercial strains LMD43 and LMD44. Both are used in  
472 distillery context, no information about their genome is currently available and therefore they are not  
473 classified in genetic groups. If we suppose that they are potentially part of the rum genetic group, this

474 will confirm our hypothesis of a characteristic link between high succinate yield and the rum group. In  
475 an interesting manner, the genetically modified strain LMD41 is both the best succinate and ethanol  
476 producer of all the set. As far as we know, genetic modifications aimed only to enhance ethanol yield  
477 but a side effect on succinate can be considered. This high succinate production can also arise from  
478 the original strain which is already used in bioethanol production. On the other hand, wine strains are  
479 very low producers of succinate, even if it can be considered as a desirable metabolite in wine,  
480 positively-linked to final quality (Chidi *et al.*, 2018). This reduced succinate production in the wine  
481 group can be explained once again by its inhibitory effect on lactic acid bacteria, which are main actors  
482 of the malo-lactic fermentation (MLF). MLF being an important step of wine making to modulate  
483 acidity, a possible hypothesis is that wine yeasts have been selected, willingly or not, to be compatible  
484 with MLF (Caridi and Corte, 1997; Son *et al.*, 2009; Torres-Guardado *et al.*, 2022).

485

486 Acetate is responsible for major off-flavour in wine, and so is subject to legal limits (Paraggio and Fiore,  
487 2004; Vilela-Moura *et al.*, 2008). It presents a large variation of yield among our strain set and no  
488 correlation has been found with more produced metabolites ethanol and glycerol. The wine genetic  
489 group shows a very low acetate yield, which is most likely a direct consequence of the selection for  
490 low acetate produced in wine fermentation. In contrast, flor group strains appear to be high producers  
491 of acetate, maybe due to their more oxidative metabolism (Moreno-García *et al.*, 2017).

492

493 Another metabolite that showed interesting results is  $\alpha$ -KG, especially for its link with genetic groups:  
494 wine strains have a higher yield than other groups. One of the main hypotheses is that it is explained  
495 by the strong relation between this metabolite and the nitrogen metabolism. Indeed,  $\alpha$ -KG is mainly  
496 used in the cell to assimilate ammonium and then synthesise glutamate. This amino acid being  
497 prominent in grape must (and therefore in the synthetic must we used),  $\alpha$ -KG is not used and simply  
498 released in the medium (Avendaño *et al.*, 1997; DeLuna *et al.*, 2001; Camarasa *et al.*, 2003; Magyar *et*  
499 *al.*, 2014). Glutamate synthesis uses NADPH cofactor, which needs to be regenerated subsequently.



500 One of the ways to produce NADPH from NADP<sup>+</sup> is the conversion of acetaldehyde to acetate (Saint-  
501 Prix *et al.*, 2004). In addition, we observed that strains from the wine groups display a low acetate  
502 yield on average (if we exclude DBVPG1373 which shows abnormal values compared to the rest of the  
503 group). In the work of Nidelet *et al.* (2016), it has been observed that acetate flux in fermentation is  
504 negatively correlated to biomass synthesis, itself negatively correlated to  $\alpha$ -KG. Even with no biomass  
505 data, the negative link between acetate and  $\alpha$ -KG on our set confirms these results. Another  
506 explanation can be linked to the low succinate production of wine strains. This metabolite being the  
507 final step of the TCA cycle oxidative branch in fermentation conditions,  $\alpha$ -KG is then produced and  
508 released as succinate is not.

509

510 Global tendencies in our data set are consistent with conclusions drawn in other publications,  
511 including those used to select our set of strains (Camarasa *et al.*, 2011; Nidelet *et al.*, 2016, Legras *et*  
512 *al.*, 2018). Strains from the west African genetic group (which gathers strains from palm wine and  
513 other traditional african beverages making processes) and from the flor group have been identified as  
514 very high acetate and low succinate producers. Acetate shows a great diversity, larger than glycerol  
515 or ethanol, in our set, which has already been shown by Tronchoni *et al.* (2022). Many comparable  
516 tendencies exist between work of Salinas *et al.* (2012) and ours for 5 strains: EC1118, L1374, L1528,  
517 DBVPG6765 and DBVPG6044. Like in our results, DBVPG6044 is a very high producer of acetate in  
518 fermentation (the second highest in our set) and the other strains have a significantly lower  
519 production with very close values. Concerning succinate, EC1118 and DBVPG6044 show low  
520 production and DBVPG6765 a higher one. If absolute values of yield or production differ, relative  
521 differences between strains seem preserved among experiments.

522

523 The metabolite by metabolite approach highlighted interesting correlations and furthermore the PCA  
524 confirmed them and proved to be a good tool to group strains by their primary metabolites  
525 production. For wine strains, metabolic clusters on the PCA match with the genetic groups except the

526 strain DBVPG1373. However, although this strain belongs to the wine group, it was isolated from soil  
527 which may explain its location. PCA reveals other noticeable results: Yllc17\_E5, which is quite aside in  
528 the phylogenetic tree (Legras *et al.* 2018), is very isolated in PCA results. EC1118, which is a commercial  
529 wine strain, has been identified as an intraspecific hybrid between strains from the wine and flor  
530 groups (Coi *et al.*, 2017). This particularity can be directly observed in our results: EC1118 is located in  
531 the wine cluster but close to the flor cluster, and shows intermediate succinate and acetate yields.  
532 LMD32 is a commercial strain with unknown classification mainly used for wine stuck fermentation  
533 restart. In PCA, it appears very close to the flor genetic group. The hypothesis that LMD32 is genetically  
534 related to the flor group would make sense because it is supposed to be used in the same condition  
535 as EC1118, which is known to be related to flor strain and appears very close to cluster 2 where other  
536 flor strains are located. Even if it has been identified as an uncommon strain (classified in rum group,  
537 but closer to laboratory and Mediterranean oak groups in Legras *et al.* (2018) and considered as part  
538 of a “Mosaic beer” group in Peter *et al.* (2018), CBS7957 shows results that bring it close to other rum  
539 strains in PCA results.

540 Even if the capacity of conducting a wine-like fermentation is considerably linked to domestication  
541 and genetic origin (strains from bread or from natural environments like oak trees are most of the  
542 time unable to perform a wine-like alcoholic fermentation (Camarasa *et al.*, 2011; Legras *et al.*, 2018;  
543 Tapia *et al.*, 2018), a complementary set of strains, wider and more balanced between genetic groups,  
544 can bring more diversity and enforce our determination of natural yield variations.

545 This work presents yield values of pure strain in fermentation: we used a pasteurised medium. No  
546 competition with bacteria or other yeasts can interfere in fermentation unlike in natural musts, where  
547 other species can impact primary metabolites yield (Tristezza *et al.*, 2016; Ciani *et al.*, 2022). The  
548 temperature used, 28°C, is common for red wine-making, but high for white wine standards which are  
549 usually fermented at colder temperatures. For strains from other genetic groups than wine, synthetic  
550 grape must can represent conditions very far from their usual environment. However, despite these

551 differences that can be overcome in scale adjustment, our methodology gives keys to identify strains  
552 with good potentialities for wine-like fermentation.

553 Multiple studies have compared numerous strains for their primary metabolites production in  
554 fermentation. However, our study compares strains from different genetic groups on a wine-like  
555 media only focusing on complete fermentation concentrations. Here we confirm precedent  
556 observations but also provide a robust comparative methodology and a data set easily usable on 51  
557 strains from various genetic backgrounds. This screening helps to define and confirm the existing  
558 phenotypic variations for wine fermentation products among the *S. cerevisiae* species and set the  
559 potential of improvement for these traits.

560 However, we only took a look at five metabolites from primary carbon metabolism so we don't have  
561 any data on notable aromatic metabolites, positively or negatively, for wine fermentation  
562 (acetaldehyde, esters, higher alcohols, acetoin...). Completing this analysis with other metabolite  
563 production information would enforce the clustering and reveal strain relevance for further strain  
564 development projects, for wine or other fields.

565

566 To conclude, our screening answers the main question asked: a diversity, weak but significant, exists  
567 in ethanol yield among the *S. cerevisiae* species. Larger fluxes, like ethanol or glycerol, are the most  
568 constraint and not linked to genetic origins, while in contrast smaller fluxes show larger variations and  
569 clear links with genetic origin. This represents improvement potentialities of wine strains for these  
570 characteristics with non-GM methods (such as adaptive laboratory evolution, positive selection,  
571 breeding...).

572 If the two major produced metabolites, ethanol and glycerol, are linked in their production, the yield  
573 of minor metabolites is more related to the genetic background of strains which is shaped by selection  
574 in a defined environment.

575

576

## Acknowledgements

577

578 The authors would like to thank Jean-Luc Legras for helpful discussion and help with strain origin,

579 Carole Camarasa for helpful discussion and Faïza Maçna for technical support with HPLC analysis.

580 The authors thank the University of Azores, Ricardo Franco-Duarte, Marie-José Ayoub, as well as the

581 National Research Institute of Brewing and all the international yeast collections for providing strains.

582 Finally, we thank Anne Ortiz-Julien from Lallemand SAS for her support to this work.

583

584

## Funding

585

586 Ludovic Monnin doctoral contract is funded by ANRT via a CIFRE agreement (n°2020/1258).

587

588

## Conflict of interest disclosure

589

590 The authors declare that they comply with the PCI rule of having no financial conflicts of interest in

591 relation to the content of the article.

592

593

## Data, scripts, code, and supplementary information availability

594

595 Supplementary data: [10.5281/zenodo.7665200](https://doi.org/10.5281/zenodo.7665200)

596 - Strain table (S1)

597 - Fermentation data (S2) containing: “read me” file, initial data, final data and strain list used

598 for R analysis

599 - R script for data analysis and figure generation (S3)

600 - Final metabolite concentrations (S4) and yields (S5)

601

602

## References

603 Akao, Takeshi, Isao Yashiro, Akira Hosoyama, Hiroshi Kitagaki, Hiroshi Horikawa, Daisuke Watanabe,

604 Rinji Akada, et al. 2011. 'Whole-Genome Sequencing of Sake Yeast *Saccharomyces Cerevisiae* Kyokai

605 No. 7'. *DNA Research* 18 (6): 423–34. <https://doi.org/10.1093/dnares/dsr029>.

606 Albatineh, Ahmed N, B.M. Golam Kibria, Meredith L Wilcox, and Bashar Zogheib. 2014. 'Confidence

607 Interval Estimation for the Population Coefficient of Variation Using Ranked Set Sampling: A

608 Simulation Study'. *Journal of Applied Statistics* 41 (4): 733–51.

609 <https://doi.org/10.1080/02664763.2013.847405>.

610 Albertyn, J., S. Hohmann, J. M. Thevelein, and B. A. Prior. 1994. 'GPD1, Which Encodes Glycerol-3-

611 Phosphate Dehydrogenase, Is Essential for Growth under Osmotic Stress in *Saccharomyces Cerevisiae*,

612 and Its Expression Is Regulated by the High-Osmolarity Glycerol Response Pathway'. *Molecular and*

613 *Cellular Biology* 14 (6): 4135–44. <https://doi.org/10.1128/mcb.14.6.4135-4144.1994>.

614 Antonelli, Andrea, Lorena Castellari, Carlo Zambonelli, and Alberta Carnacini. 1999. 'Yeast Influence

615 on Volatile Composition of Wines'. *Journal of Agricultural and Food Chemistry* 47 (3): 1139–44.

616 <https://doi.org/10.1021/jf9807317>.

617 Avendaño, A., A. Deluna, H. Olivera, L. Valenzuela, and A. Gonzalez. 1997. 'GDH3 Encodes a Glutamate

618 Dehydrogenase Isozyme, a Previously Unrecognized Route for Glutamate Biosynthesis in

619 *Saccharomyces Cerevisiae*'. *Journal of Bacteriology*, September.

620 <https://journals.asm.org/doi/abs/10.1128/jb.179.17.5594-5597.1997>.

621 Ayoub, Marie-José, Jean-Luc Legras, Pierre Abi-Nakhoul, Huu-Vang Nguyen, Rachad Saliba, and Claude

622 Gaillardin. 2021. 'Lebanon's Native Oenological *Saccharomyces Cerevisiae* Flora: Assessment of

- 623 Different Aspects of Genetic Diversity and Evaluation of Winemaking Potential'. *Journal of Fungi* 7 (8):  
624 678. <https://doi.org/10.3390/jof7080678>.
- 625 Bakker, Barbara M., Karin M. Overkamp, Antonius J.A. van Maris, Peter Kötter, Marijke A.H. Luttik,  
626 Johannes P. van Dijken, and Jack T. Pronk. 2001. 'Stoichiometry and Compartmentation of NADH  
627 Metabolism in *Saccharomyces Cerevisiae*'. *FEMS Microbiology Reviews* 25 (1): 15–37.  
628 <https://doi.org/10.1111/j.1574-6976.2001.tb00570.x>.
- 629 Bely, Marina, Jean-Marie Sablayrolles, and Pierre Barre. 1990. 'Automatic Detection of Assimilable  
630 Nitrogen Deficiencies during Alcoholic Fermentation in Oenological Conditions'. *Journal of*  
631 *Fermentation and Bioengineering* 70 (4): 246–52. [https://doi.org/10.1016/0922-338X\(90\)90057-4](https://doi.org/10.1016/0922-338X(90)90057-4).
- 632 Bro, Christoffer, Birgitte Regenber, Jochen Förster, and Jens Nielsen. 2006. 'In Silico Aided Metabolic  
633 Engineering of *Saccharomyces Cerevisiae* for Improved Bioethanol Production'. *Metabolic Engineering*  
634 8 (2): 102–11. <https://doi.org/10.1016/j.ymben.2005.09.007>.
- 635 Camarasa, Carole, Jean-Philippe Grivet, and Sylvie Dequin. 2003. 'Investigation by <sup>13</sup>C-NMR and  
636 Tricarboxylic Acid (TCA) Deletion Mutant Analysis of Pathways for Succinate Formation in  
637 *Saccharomyces Cerevisiae* during Anaerobic Fermentation'. *Microbiology* 149 (Pt 9): 2669–78.  
638 <https://doi.org/10.1099/mic.0.26007-0>.
- 639 Camarasa, Carole, Isabelle Sanchez, Pascale Brial, Frédéric Bigey, and Sylvie Dequin. 2011. 'Phenotypic  
640 Landscape of *Saccharomyces Cerevisiae* during Wine Fermentation: Evidence for Origin-Dependent  
641 Metabolic Traits'. *PLOS ONE* 6 (9): e25147. <https://doi.org/10.1371/journal.pone.0025147>.
- 642 Caridi, Andrea, and Vito Corte. 1997. 'Inhibition of Malolactic Fermentation by Cryotolerant Yeasts'.  
643 *Biotechnology Letters* 19 (8): 723–26. <https://doi.org/10.1023/A:1018319705617>.
- 644 Celton, Magalie, Anne Goelzer, Carole Camarasa, Vincent Fromion, and Sylvie Dequin. 2012. 'A  
645 Constraint-Based Model Analysis of the Metabolic Consequences of Increased NADPH Oxidation in

- 646 *Saccharomyces Cerevisiae*. *Metabolic Engineering* 14 (4): 366–79.  
647 <https://doi.org/10.1016/j.ymben.2012.03.008>.
- 648 Chidi, B. S., F. F. Bauer, and D. Rossouw. 2018. 'Organic Acid Metabolism and the Impact of  
649 Fermentation Practices on Wine Acidity: A Review'. *South African Journal of Enology and Viticulture*  
650 39 (2): 1–15. <https://doi.org/10.21548/39-2-3164>.
- 651 Ciani, Maurizio, Laura Canonico, and Francesca Comitini. 2022. 'Chapter 10 - Improving White Wine  
652 Aroma and Structure by Non-Saccharomyces Yeasts'. In *White Wine Technology*, edited by Antonio  
653 Morata, 117–30. Academic Press. <https://doi.org/10.1016/B978-0-12-823497-6.00020-X>.
- 654 Coi, A. L., F. Bigey, S. Mallet, S. Marsit, G. Zara, P. Gladieux, V. Galeote, M. Budroni, S. Dequin, and J.  
655 L. Legras. 2017. 'Genomic Signatures of Adaptation to Wine Biological Ageing Conditions in Biofilm-  
656 Forming Flor Yeasts'. *Molecular Ecology* 26 (7): 2150–66. <https://doi.org/10.1111/mec.14053>.
- 657 De Deken, R. H. 1966. 'The Crabtree Effect: A Regulatory System in Yeast'. *Microbiology* 44 (2): 149–  
658 56. <https://doi.org/10.1099/00221287-44-2-149>.
- 659 DeLuna, Alexander, Amaranta Avendaño, Lina Riego, and Alicia González. 2001. 'NADP-Glutamate  
660 Dehydrogenase Isoenzymes of *Saccharomyces Cerevisiae*: PURIFICATION, KINETIC PROPERTIES, AND  
661 PHYSIOLOGICAL ROLES\*'. *Journal of Biological Chemistry* 276 (47): 43775–83.  
662 <https://doi.org/10.1074/jbc.M107986200>.
- 663 Deroite, Amandine, Jean-Luc Legras, Peggy Rigou, Anne Ortiz-Julien, and Sylvie Dequin. 2018. 'Lipids  
664 Modulate Acetic Acid and Thiol Final Concentrations in Wine during Fermentation by *Saccharomyces*  
665 *Cerevisiae* × *Saccharomyces Kudriavzevii* Hybrids'. *AMB Express* 8 (1): 130.  
666 <https://doi.org/10.1186/s13568-018-0657-5>.
- 667 Dong, Shi-Jun, Xiang-Hua Lin, and Hao Li. 2015. 'Regulation of *Lactobacillus Plantarum* Contamination  
668 on the Carbohydrate and Energy Related Metabolisms of *Saccharomyces Cerevisiae* during Bioethanol

- 669 Fermentation'. *The International Journal of Biochemistry & Cell Biology* 68 (November): 33–41.  
670 <https://doi.org/10.1016/j.biocel.2015.08.010>.
- 671 Dorta, C., P. Oliva-Neto, M.S. de -Abreu-Neto, N. Nicolau-Junior, and A.I. Nagashima. 2005. 'Synergism  
672 among Lactic Acid, Sulfite, PH and Ethanol in Alcoholic Fermentation of *Saccharomyces Cerevisiae* (PE-  
673 2 and M-26)'. *World Journal of Microbiology and Biotechnology* 22 (2): 177.  
674 <https://doi.org/10.1007/s11274-005-9016-1>.
- 675 Du, Gang, J. Zhan, J. Li, Yilin You, Yu Zhao, and Weidong Huang. 2012. 'Effect of Fermentation  
676 Temperature and Culture Medium on Glycerol and Ethanol during Wine Fermentation'. *American  
677 Journal of Enology and Viticulture*. <https://doi.org/10.5344/ajev.2011.11067>.
- 678 Eder, Matthias, Isabelle Sanchez, Claire Brice, Carole Camarasa, Jean-Luc Legras, and Sylvie Dequin.  
679 2018. 'QTL Mapping of Volatile Compound Production in *Saccharomyces Cerevisiae* during Alcoholic  
680 Fermentation'. *BMC Genomics* 19 (1): 166. <https://doi.org/10.1186/s12864-018-4562-8>.
- 681 Fay, Justin C., and Joseph A. Benavides. 2005. 'Evidence for Domesticated and Wild Populations of  
682 *Saccharomyces Cerevisiae*'. *PLOS Genetics* 1 (1): e5. <https://doi.org/10.1371/journal.pgen.0010005>.
- 683 Goold, Hugh D., Heinrich Kroukamp, Thomas C. Williams, Ian T. Paulsen, Cristian Varela, and Isak S.  
684 Pretorius. 2017. 'Yeast's Balancing Act between Ethanol and Glycerol Production in Low-alcohol  
685 Wines'. *Microbial Biotechnology* 10 (2): 264–78. <https://doi.org/10.1111/1751-7915.12488>.
- 686 Hubmann, Georg, Maria R. Foulquié-Moreno, Elke Nevoigt, Jorge Duitama, Nicolas Meurens, Thiago  
687 M. Pais, Lotte Mathé, et al. 2013. 'Quantitative Trait Analysis of Yeast Biodiversity Yields Novel Gene  
688 Tools for Metabolic Engineering'. *Metabolic Engineering* 17 (May): 68–81.  
689 <https://doi.org/10.1016/j.ymben.2013.02.006>.
- 690 Hubmann, Georg, Lotte Mathé, Maria R. Foulquié-Moreno, Jorge Duitama, Elke Nevoigt, and Johan  
691 M. Thevelein. 2013. 'Identification of Multiple Interacting Alleles Conferring Low Glycerol and High



- 692 Ethanol Yield in *Saccharomyces Cerevisiae* Ethanolic Fermentation'. *Biotechnology for Biofuels* 6 (1):  
693 87. <https://doi.org/10.1186/1754-6834-6-87>.
- 694 Legras, Jean-Luc, Virginie Galeote, Frédéric Bigey, Carole Camarasa, Souhir Marsit, Thibault Nidelet,  
695 Isabelle Sanchez, et al. 2018. 'Adaptation of *S. Cerevisiae* to Fermented Food Environments Reveals  
696 Remarkable Genome Plasticity and the Footprints of Domestication'. *Molecular Biology and Evolution*  
697 35 (7): 1712–27. <https://doi.org/10.1093/molbev/msy066>.
- 698 Liti, Gianni, David M. Carter, Alan M. Moses, Jonas Warringer, Leopold Parts, Stephen A. James, Robert  
699 P. Davey, et al. 2009. 'Population Genomics of Domestic and Wild Yeasts'. *Nature* 458 (7236): 337–41.  
700 <https://doi.org/10.1038/nature07743>.
- 701 Liu, Li, Jiajing Wang, Danny Rosenberg, Hao Zhao, György Lengyel, and Dani Nadel. 2018. 'Fermented  
702 Beverage and Food Storage in 13,000 y-Old Stone Mortars at Raqefet Cave, Israel: Investigating  
703 Natufian Ritual Feasting'. *Journal of Archaeological Science: Reports* 21 (October): 783–93.  
704 <https://doi.org/10.1016/j.jasrep.2018.08.008>.
- 705 Magyar, Ildikó, Diána Nyitrai-Sárdy, Annamária Leskó, Andrea Pomázi, and Miklós Kállay. 2014.  
706 'Anaerobic Organic Acid Metabolism of *Candida Zemplinina* in Comparison with *Saccharomyces* Wine  
707 Yeasts'. *International Journal of Food Microbiology* 178 (May): 1–6.  
708 <https://doi.org/10.1016/j.ijfoodmicro.2014.03.002>.
- 709 Marsit, Souhir, Adriana Mena, Frédéric Bigey, François-Xavier Sauvage, Arnaud Couloux, Julie Guy,  
710 Jean-Luc Legras, Eladio Barrio, Sylvie Dequin, and Virginie Galeote. 2015. 'Evolutionary Advantage  
711 Conferred by an Eukaryote-to-Eukaryote Gene Transfer Event in Wine Yeasts'. *Molecular Biology and*  
712 *Evolution* 32 (7): 1695–1707. <https://doi.org/10.1093/molbev/msv057>.

- 713 McGovern, Patrick E., Juzhong Zhang, Jigen Tang, Zhiqing Zhang, Gretchen R. Hall, Robert A. Moreau,  
714 Alberto Nuñez, et al. 2004. 'Fermented Beverages of Pre- and Proto-Historic China'. *Proceedings of*  
715 *the National Academy of Sciences* 101 (51): 17593–98.
- 716 Moreno-García, Jaime, Juan Carlos Mauricio, Juan Moreno, and Teresa García-Martínez. 2017.  
717 'Differential Proteome Analysis of a Flor Yeast Strain under Biofilm Formation'. *International Journal*  
718 *of Molecular Sciences* 18 (4): 720. <https://doi.org/10.3390/ijms18040720>.
- 719 Nidelet, Thibault, Pascale Brial, Carole Camarasa, and Sylvie Dequin. 2016. 'Diversity of Flux  
720 Distribution in Central Carbon Metabolism of *S. Cerevisiae* Strains from Diverse Environments'.  
721 *Microbial Cell Factories* 15 (1): 58. <https://doi.org/10.1186/s12934-016-0456-0>.
- 722 Nieuwoudt, Hélène H., Isak S. Pretorius, Florian F. Bauer, Daniel G. Nel, and Bernard A. Prior. 2006.  
723 'Rapid Screening of the Fermentation Profiles of Wine Yeasts by Fourier Transform Infrared  
724 Spectroscopy'. *Journal of Microbiological Methods* 67 (2): 248–56.  
725 <https://doi.org/10.1016/j.mimet.2006.03.019>.
- 726 Noble, A. C., and G. F. Bursick. 1984. 'The Contribution of Glycerol to Perceived Viscosity and  
727 Sweetness in White Wine'. *American Journal of Enology and Viticulture* 35 (2): 110–12.
- 728 Novo, Maite, Frédéric Bigey, Emmanuelle Beyne, Virginie Galeote, Frédérick Gavory, Sandrine Mallet,  
729 Brigitte Cambon, et al. 2009. 'Eukaryote-to-Eukaryote Gene Transfer Events Revealed by the Genome  
730 Sequence of the Wine Yeast *Saccharomyces Cerevisiae* EC1118'. *Proceedings of the National Academy*  
731 *of Sciences* 106 (38): 16333–38. <https://doi.org/10.1073/pnas.0904673106>.
- 732 Paraggio, Margherita, and Concetta Fiore. 2004. 'Screening of *Saccharomyces Cerevisiae* Wine Strains  
733 for the Production of Acetic Acid'. *World Journal of Microbiology and Biotechnology* 20 (7): 743–47.  
734 <https://doi.org/10.1007/s11274-004-4516-y>.

- 735 Peter, Jackson, Matteo De Chiara, Anne Friedrich, Jia-Xing Yue, David Pflieger, Anders Bergström,  
736 Anastasie Sigwalt, et al. 2018. 'Genome Evolution across 1,011 *Saccharomyces Cerevisiae* Isolates'.  
737 *Nature* 556 (7701): 339–44. <https://doi.org/10.1038/s41586-018-0030-5>.
- 738 Pfeiffer, Thomas, and Annabel Morley. 2014. 'An Evolutionary Perspective on the Crabtree Effect'.  
739 *Frontiers in Molecular Biosciences* 1. <https://doi.org/10.3389/fmolb.2014.00017>.
- 740 Quirós, Manuel, Rubén Martínez-Moreno, Joan Albiol, Pilar Morales, Felicitas Vázquez-Lima, Antonio  
741 Barreiro-Vázquez, Pau Ferrer, and Ramon Gonzalez. 2013. 'Metabolic Flux Analysis during the  
742 Exponential Growth Phase of *Saccharomyces Cerevisiae* in Wine Fermentations'. *PLOS ONE* 8 (8):  
743 e71909. <https://doi.org/10.1371/journal.pone.0071909>.
- 744 Regodón Mateos, J. A., F. Pérez-Nevaldo, and M. Ramírez Fernández. 2006. 'Influence of  
745 *Saccharomyces Cerevisiae* Yeast Strain on the Major Volatile Compounds of Wine'. *Enzyme and*  
746 *Microbial Technology*, Papers from the 1st International Conference on Environmental, Industrial and  
747 Applied Microbiology (BioMicroWorld-2005), 40 (1): 151–57.  
748 <https://doi.org/10.1016/j.enzmictec.2005.10.048>.
- 749 Rollero, Stéphanie, Audrey Bloem, Carole Camarasa, Isabelle Sanchez, Anne Ortiz-Julien, Jean-Marie  
750 Sablayrolles, Sylvie Dequin, and Jean-Roch Mouret. 2015. 'Combined Effects of Nutrients and  
751 Temperature on the Production of Fermentative Aromas by *Saccharomyces Cerevisiae* during Wine  
752 Fermentation'. *Applied Microbiology and Biotechnology* 99 (5): 2291–2304.  
753 <https://doi.org/10.1007/s00253-014-6210-9>.
- 754 Saint-Prix, Florence, Linda Bönquist, and SylvieYR 2004 Dequin. 2004. 'Functional Analysis of the *ALD*  
755 Gene Family of *Saccharomyces Cerevisiae* during Anaerobic Growth on Glucose: The NADP+-  
756 Dependent Ald6p and Ald5p Isoforms Play a Major Role in Acetate Formation'. *Microbiology* 150 (7):  
757 2209–20. <https://doi.org/10.1099/mic.0.26999-0>.

- 758 Salinas, Francisco, Francisco A. Cubillos, Daniela Soto, Verónica García, Anders Bergström, Jonas  
759 Warringer, M. Angélica Ganga, Edward J. Louis, Gianni Liti, and Claudio Martinez. 2012. 'The Genetic  
760 Basis of Natural Variation in Oenological Traits in *Saccharomyces Cerevisiae*'. *PLOS ONE* 7 (11): e49640.  
761 <https://doi.org/10.1371/journal.pone.0049640>.
- 762 Schacherer, Joseph, Joshua A. Shapiro, Douglas M. Ruderfer, and Leonid Kruglyak. 2009.  
763 'Comprehensive Polymorphism Survey Elucidates Population Structure of *S. Cerevisiae*'. *Nature* 458  
764 (7236): 342–45. <https://doi.org/10.1038/nature07670>.
- 765 Son, Hong-Seok, Geum-Sook Hwang, Won-Mok Park, Young-Shick Hong, and Cherl-Ho Lee. 2009.  
766 'Metabolomic Characterization of Malolactic Fermentation and Fermentative Behaviors of Wine  
767 Yeasts in Grape Wine'. *Journal of Agricultural and Food Chemistry* 57 (11): 4801–9.  
768 <https://doi.org/10.1021/jf9005017>.
- 769 Tapia, Sebastián M., Mara Cuevas, Valentina Abarca, Verónica Delgado, Vicente Rojas, Verónica  
770 García, Claire Brice, et al. 2018. '*GPD1* and *ADH3* Natural Variants Underlie Glycerol Yield Differences  
771 in Wine Fermentation'. *Frontiers in Microbiology* 9. <https://doi.org/10.3389/fmicb.2018.01460>.
- 772 Tilloy, Valentin, Axelle Cadière, Maryam Ehsani, and Sylvie Dequin. 2015. 'Reducing Alcohol Levels in  
773 Wines through Rational and Evolutionary Engineering of *Saccharomyces Cerevisiae*'. *International*  
774 *Journal of Food Microbiology* 213 (November): 49–58.  
775 <https://doi.org/10.1016/j.ijfoodmicro.2015.06.027>.
- 776 Tilloy, Valentin, Anne Ortiz-Julien, and Sylvie Dequin. 2014. 'Reduction of Ethanol Yield and  
777 Improvement of Glycerol Formation by Adaptive Evolution of the Wine Yeast *Saccharomyces*  
778 *Cerevisiae* under Hyperosmotic Conditions'. *Applied and Environmental Microbiology* 80 (8): 2623–32.  
779 <https://doi.org/10.1128/AEM.03710-13>.

- 780 Torres-Guardado, Rafael, Nicolas Rozès, Braulio Esteve-Zaroso, Cristina Reguant, and Albert Bordons.  
781 2022. 'Influence of Succinic Acid on *Oenococcus Oeni* and Malolactic Fermentation'. *OENO One* 56 (3):  
782 195–204. <https://doi.org/10.20870/oenone.2022.56.3.5403>.
- 783 Tristezza, Mariana, Maria Tufariello, Vittorio Capozzi, Giuseppe Spano, Giovanni Mita, and Francesco  
784 Grieco. 2016. 'The Oenological Potential of *Hanseniaspora Uvarum* in Simultaneous and Sequential  
785 Co-Fermentation with *Saccharomyces Cerevisiae* for Industrial Wine Production'. *Frontiers in*  
786 *Microbiology* 7. <https://www.frontiersin.org/article/10.3389/fmicb.2016.00670>.
- 787 Tronchoni, Jordi, Ramon Gonzalez, Andrea M. Guindal, Elena Calleja, and Pilar Morales. 2022.  
788 'Exploring the Suitability of *Saccharomyces Cerevisiae* Strains for Winemaking under Aerobic  
789 Conditions'. *Food Microbiology* 101 (February): 103893. <https://doi.org/10.1016/j.fm.2021.103893>.
- 790 Varela, Javier, and Cristian Varela. 2019. 'Microbiological Strategies to Produce Beer and Wine with  
791 Reduced Ethanol Concentration'. *Current Opinion in Biotechnology, Food Biotechnology • Plant*  
792 *Biotechnology*, 56 (April): 88–96. <https://doi.org/10.1016/j.copbio.2018.10.003>.
- 793 Vilela-Moura, A., D. Schuller, A. Mendes-Faia, and M. Côrte-Real. 2008. 'Reduction of Volatile Acidity  
794 of Wines by Selected Yeast Strains'. *Applied Microbiology and Biotechnology* 80 (5): 881.  
795 <https://doi.org/10.1007/s00253-008-1616-x>.
- 796
- 797
- 798
